# Supplementary material
Source: Springer Nature journal article supplement (https://www.springermedizin.de/resource/supplementary/13023_2013_735_MOESM5_ESM.pdf/9642928)
Supplement: MOESM5 [file 9642928]

| Age                  | Prevalence per 10,000 |                    | Crude Incidence per 10,000 |                  | Mortality per 100,000 |                    | Fatality per 1,000 |                  |
|----------------------|-----------------------|--------------------|----------------------------|------------------|-----------------------|--------------------|--------------------|------------------|
|                      | Rate                  | C.I. 95%           | Rate                       | C.I. 95%         | Rate                  | C.I. 95%           | Rate               | C.I. 95%         |
| <b>0-17 years</b>    | 44.05                 | 42.61-45.49        | 3.96                       | 3.52-4.39        | 10.21                 | 8.01-12.41         | 3.59               | 1.37-5.81        |
| 0-12 months          | 25.73                 | 21.23-30.24        | 25.73                      | 21.23-30.24      | 0.56*                 | 0.35*-0.77*        | 19.23              | 4.74-33.72       |
| 1-17 years           | 45.22                 | 43.71-46.72        | 4.26                       | 3.80-4.73        | 7.29                  | 6.69-7.90          | 2.98               | 0.92-5.04        |
| <i>1-14 years</i>    | 46.25                 | 44.58-47.93        | 4.41                       | 3.89-4.92        | 8.00                  | 7.30-8.69          | 3.10               | 0.81-5.39        |
| <i>15-17 years</i>   | 40.26                 | 36.84-43.68        | 3.57                       | 2.55-4.59        | 3.93                  | 2.86-5.00          | 2.36               | 0.00-6.99        |
| <b>18-64 years</b>   | 31.34                 | 30.72-31.96        | 3.70                       | 3.48-3.91        | 9.03                  | 7.97-10.09         | 3.70               | 2.33-5.07        |
| <b>over 65 years</b> | 17.68                 | 16.83-18.53        | 2.90                       | 2.56-3.25        | 28.51                 | 25.10-31.91        | 26.79              | 17.49-36.10      |
| <b>TOTAL</b>         | <b>33.09</b>          | <b>32.56-33.62</b> | <b>3.85</b>                | <b>3.67-4.03</b> | <b>13.04</b>          | <b>12.02-14.06</b> | <b>5.99</b>        | <b>4.58-7.40</b> |

\* rate per 1,000 live births
